# Supplementary material for: Ameliorative Effect of Mannuronate Oligosaccharides on Hyperuricemic Mice via Promoting Uric Acid Excretion and Modulating Gut Microbiota
Source: MDPI journal article supplement (doi:10.3390/nu15020417), 2023-01-13
Supplement: s1 [file s1]

**Table S1.** The variability of the intestinal flora structure between groups.

| combination | SumsOfSqs | MeanSqs  | F.Model  | R2       | P.value  | P.value.corrected |
|-------------|-----------|----------|----------|----------|----------|-------------------|
| M <-> MOS   | 0.240306  | 0.240306 | 2.972353 | 0.175130 | 0.000999 | 0.001998          |
| M <-> N     | 0.671886  | 0.671886 | 7.849656 | 0.359258 | 0.001998 | 0.001998          |
| MOS <-> N   | 0.970021  | 0.970021 | 9.661265 | 0.408316 | 0.001998 | 0.001998          |

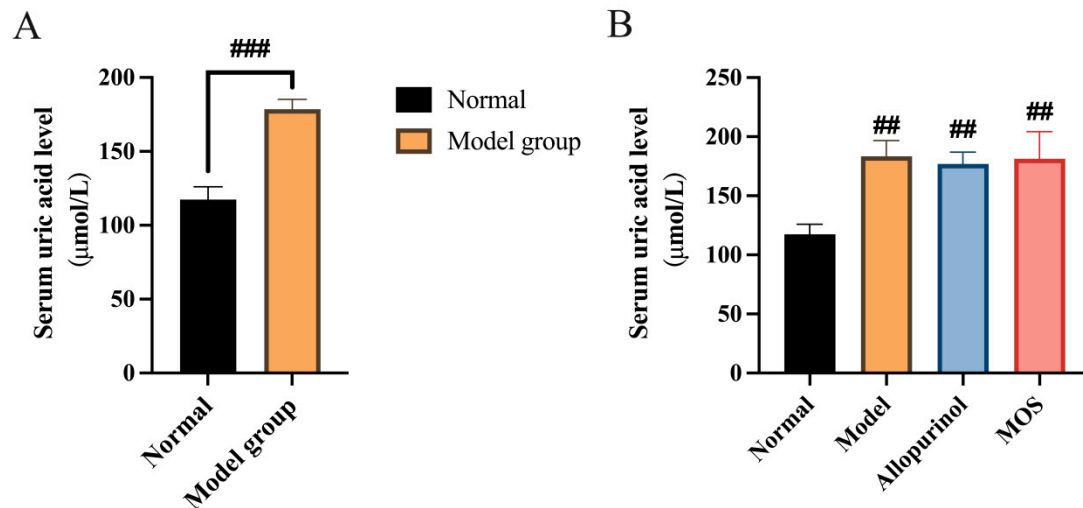

**Figure S1.** Serum uric acid levels after four weeks of induced hyperuricemia in the first experiments. Normal vs Model group (A); Normal vs Model, Allopurinol, and MOS group (B). ##  $p < 0.01$  and ###  $p < 0.001$  versus normal.

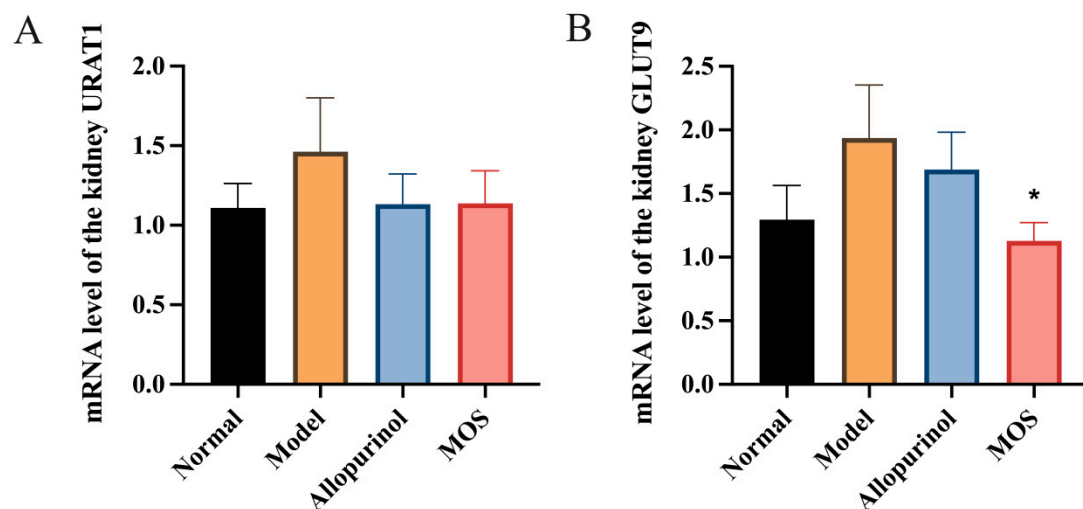

**Figure S2.** Effect of MOS on mRNA levels of uric acid transporters. mRNA level of the kidney URAT1 (A); mRNA level of the kidney GLUT9 (B). \* $p < 0.05$  versus model.

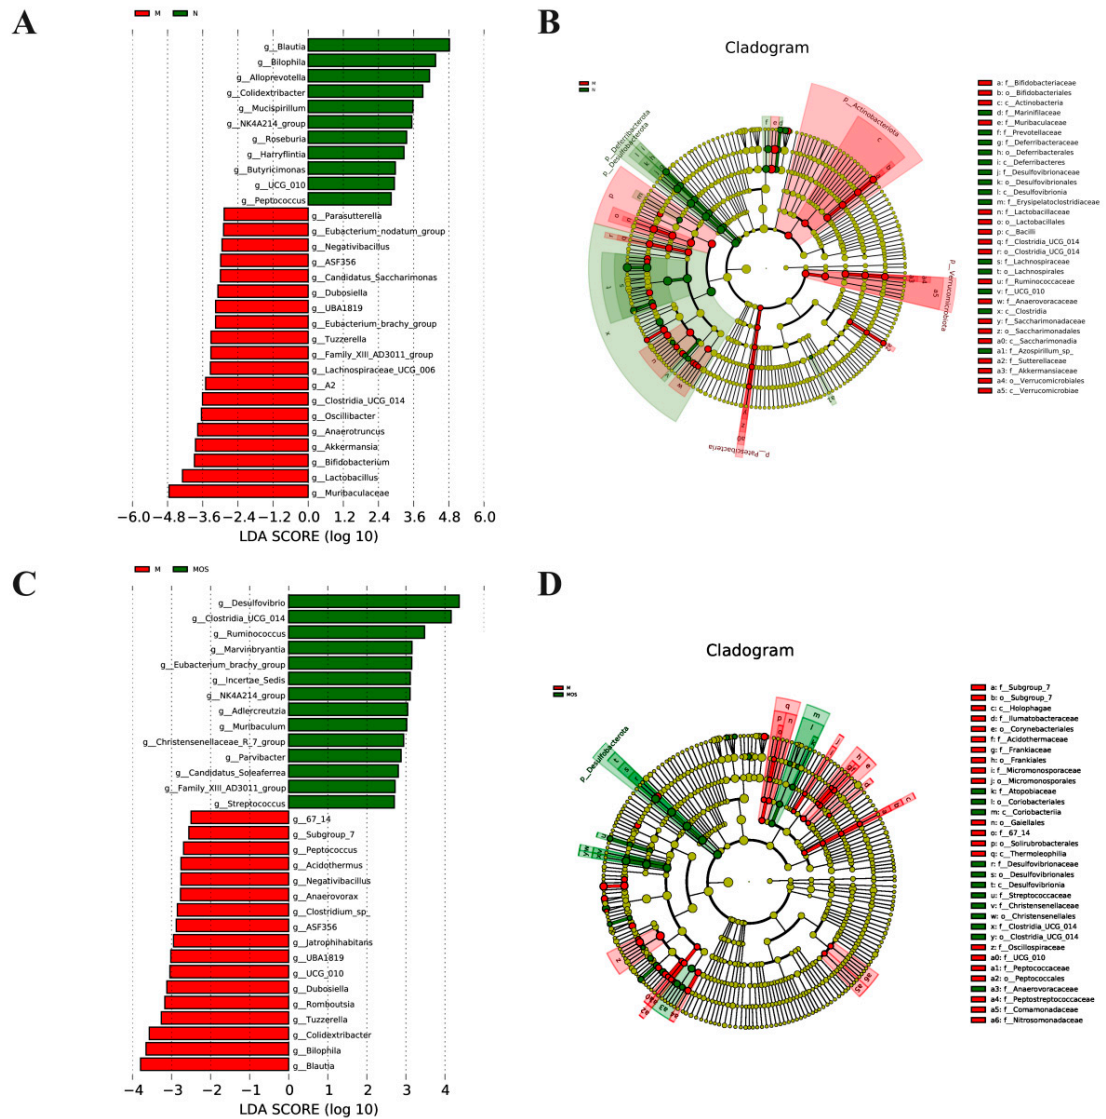

**Figure S3.** Microbial taxa discrepancies among normal, model, and MOS groups (LDA scores of >2.5 and adjusted p values of <0.05). Histogram of N vs. M (A); Cladogram of N vs. M (B); Histogram of M vs. MOS (C); Cladogram of M vs. MOS (D).

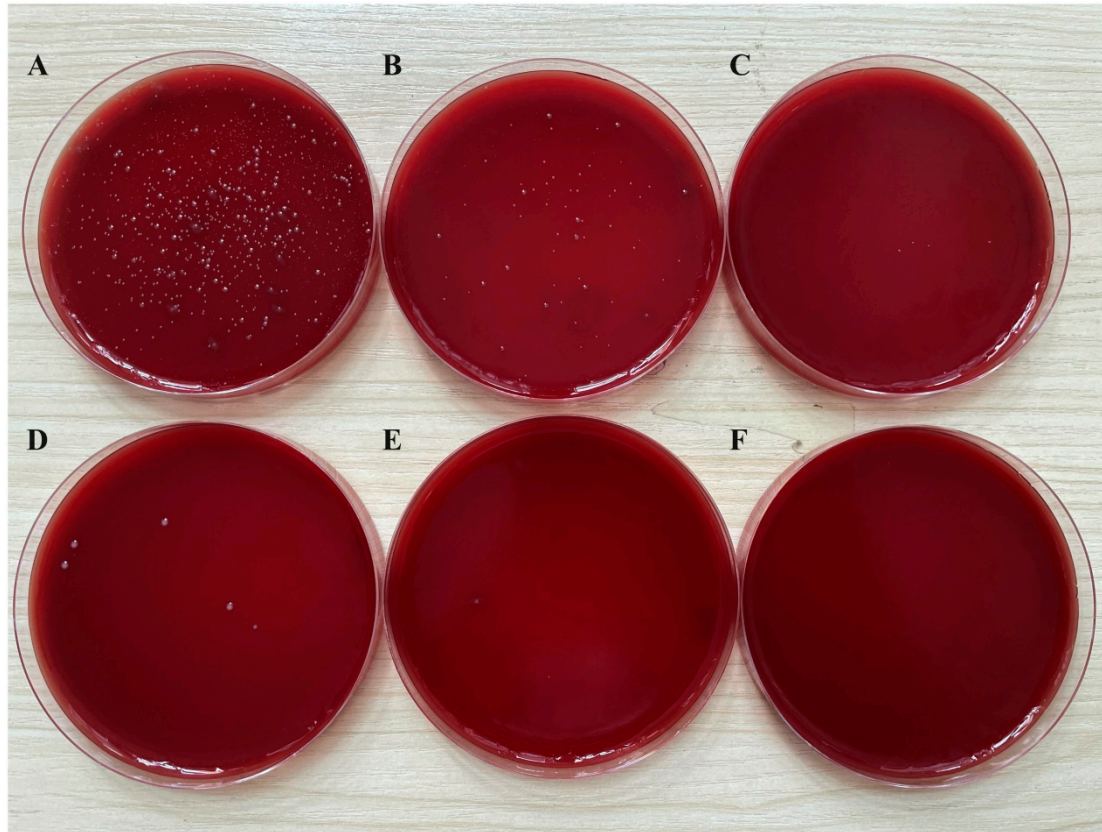

**Figure S4.** Number of colonies in feces in the second experiments. A to C show the normal group:  $10^{-2}$  dilution gradient (A);  $10^{-3}$  dilution gradient (B);  $10^{-4}$  dilution gradient (C). D to F show the antibiotic group:  $10^{-2}$  dilution gradient (D);  $10^{-3}$  dilution gradient (E);  $10^{-4}$  dilution gradient (F).

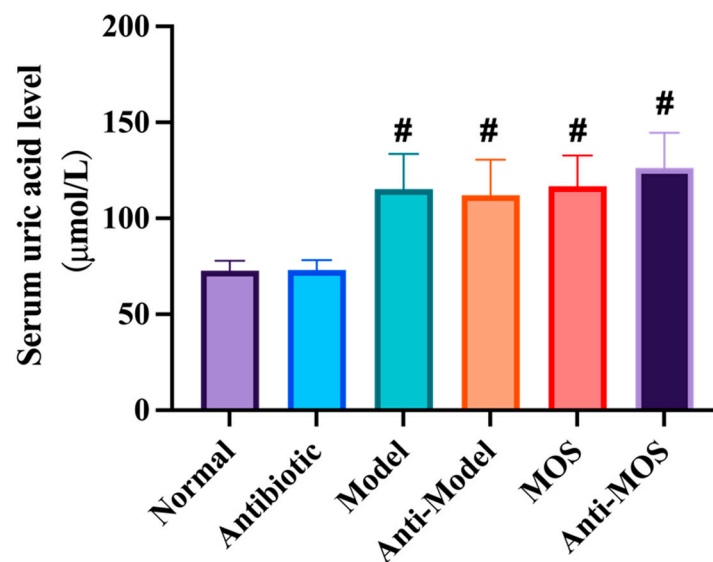

**Figure S5.** Serum uric acid levels after four weeks of induced hyperuricemia in the second experiments. #  $p < 0.05$  versus normal.
